# Supplementary material for: Mesh-like LiZnBO3/C composites as a prominent stable anode for lithium ion rechargeable batteries
Source: Royal Society of Chemistry journal article supplement (doi:10.1039/c6ta01624c), 2016-01-01
Supplement: c6ta01624c1.pdf [file c6ta01624c1.pdf]

## Supporting Information

### Mesh-like $\text{LiZnBO}_3/\text{C}$ composites as a prominent stable anode for lithium ion rechargeable batteries

Aihua Li, Liqiang Xu\*, Changming Li\* and Yitai Qian

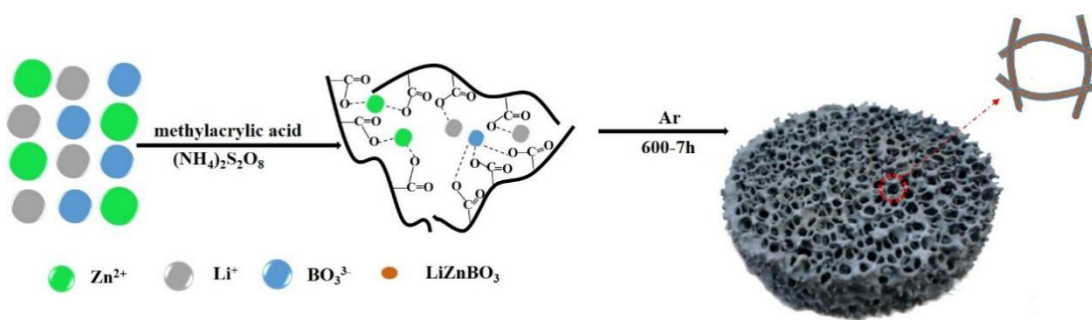

**Scheme S1.** The formation schematic illustration of the mesh-like  $\text{LiZnBO}_3/\text{C}$ .

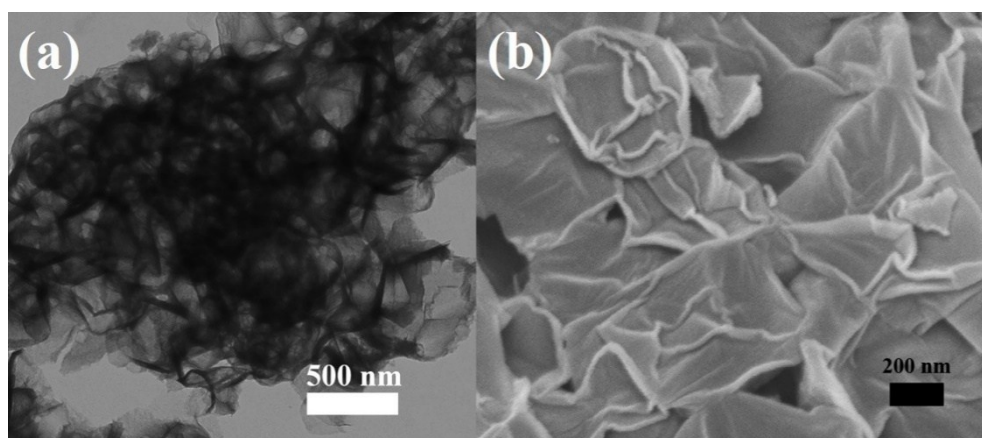

**Fig. S1.** (a)TEM and (b) FESEM images of the 2D carbon without addition of Li, Zn and B related reagents.

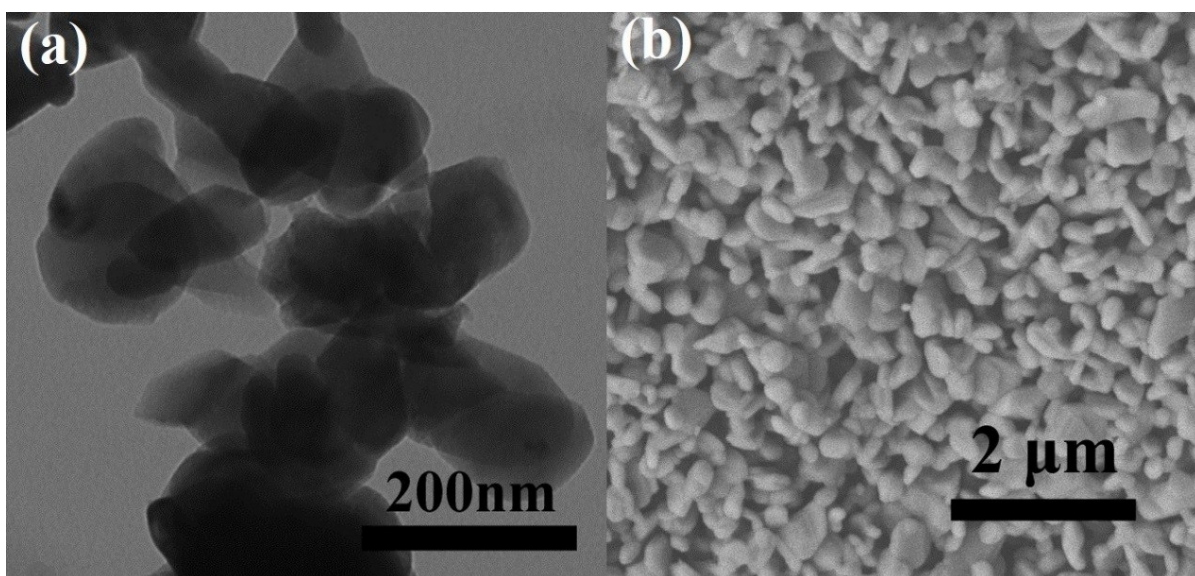

**Fig. S2.** (a) TEM and (b) FESEM images of the “600-7h Air”.

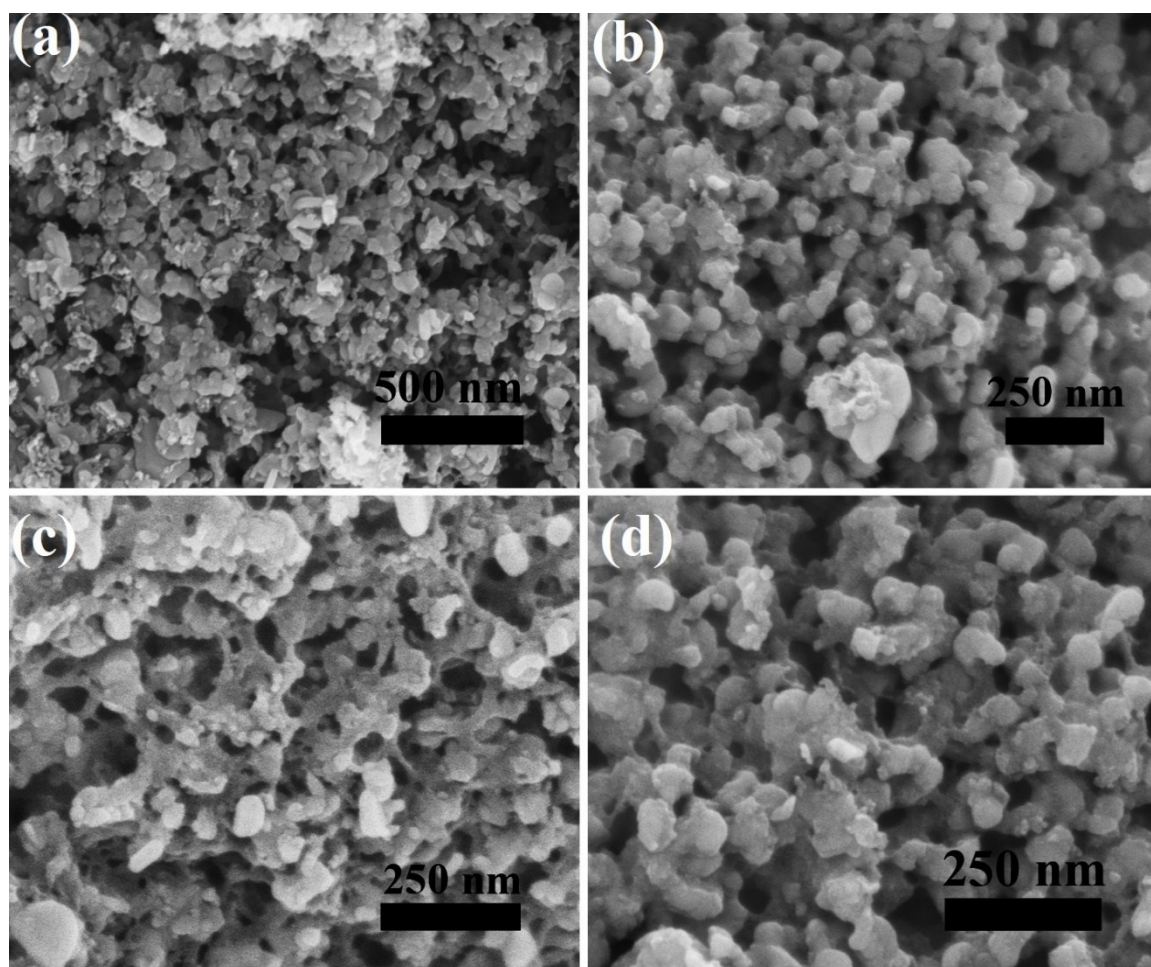

**Fig. S3.** (a-d) FESEM images of the sample calcined at 600°C in Ar for 2 hours.

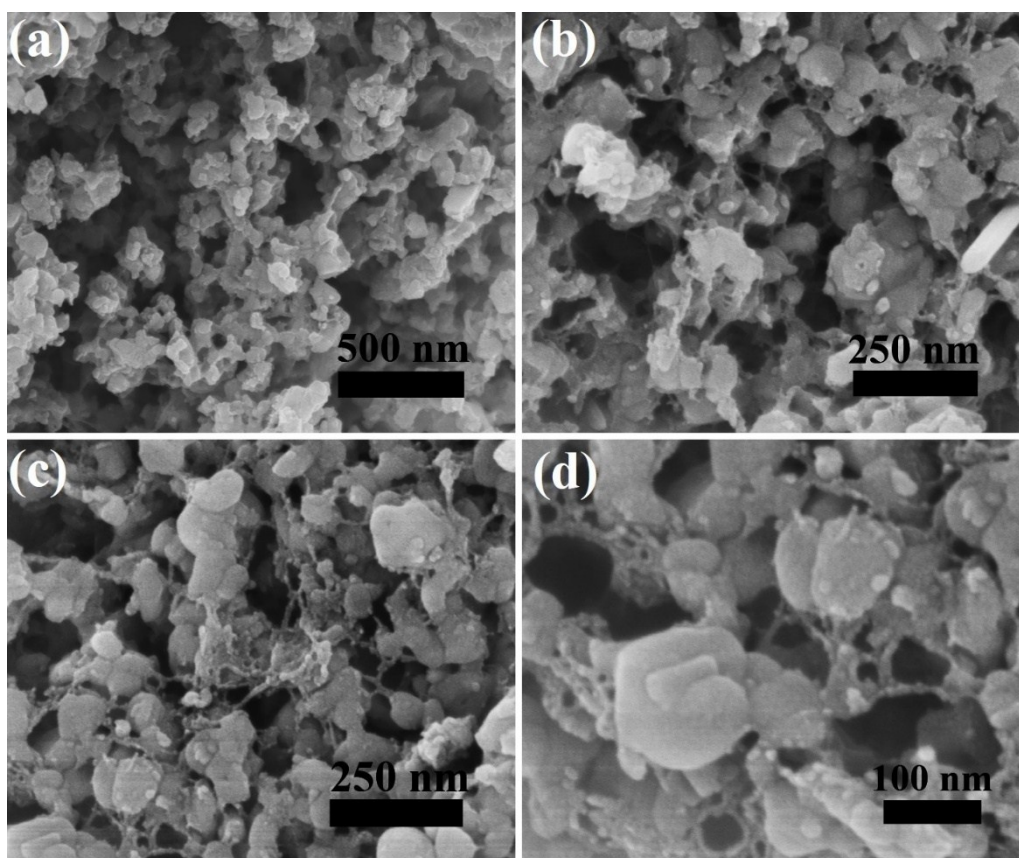

**Fig. S4.** (a-d) FESEM images of the sample calcined at 600°C in Ar for 4 hours.

It is noted that the raw resources and subsequent calcination conditions (including calcination time, atmosphere, etc.) are two main factors that affect the morphology of the  $\text{LiZnBO}_3/\text{C}$  product. On the one hand, the formation of the mesh-like  $\text{LiZnBO}_3/\text{C}$  composite is resulted from the interaction between the Li, Zn, B, C sources (only 2D layered carbon or  $\text{LiZnBO}_3$  particles could be obtained in the absence of Li, Zn, B or C sources, see Fig. S1 or S2); On the other hand, the size of the  $\text{LiZnBO}_3$  particles gradually decreased from  $\sim 100$  nm to 1~2 nm and the mesh-like  $\text{LiZnBO}_3/\text{C}$  structure gradually formed upon the calcination time increased from 2 hours to 7 hours (Fig. S3 and S4). When  $\text{Zn}(\text{NO}_3)_2$ ,  $\text{ZnSO}_4$ ,  $\text{Zn}(\text{OH})_2$  and  $\text{ZnCl}_2$  were used as different zinc resources, no pure  $\text{LiZnBO}_3/\text{C}$  could be obtained except using  $\text{Zn}(\text{NO}_3)_2$  (Fig. S5)

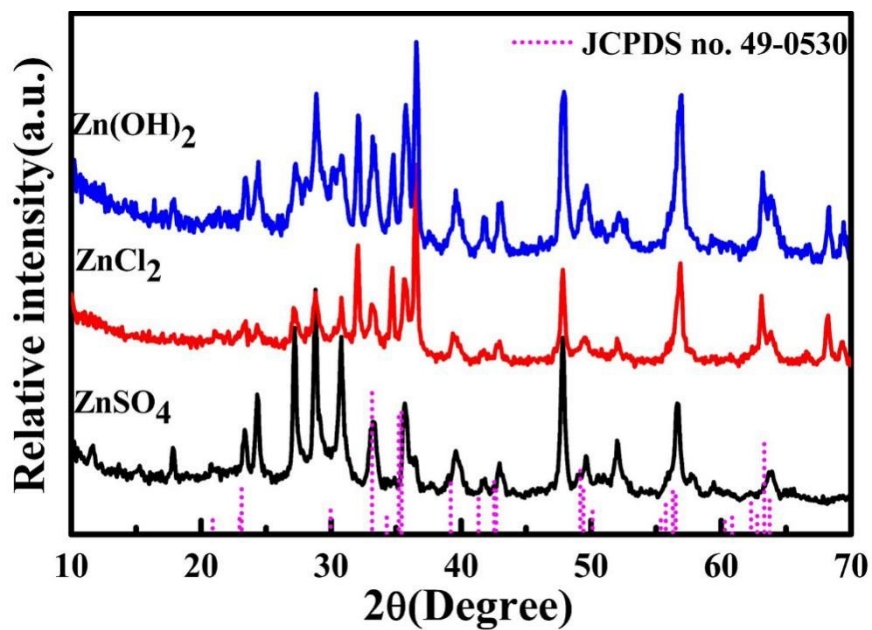

**Figure S5.** XRD patterns of the samples using ZnSO<sub>4</sub>, Zn(OH)<sub>2</sub> and ZnCl<sub>2</sub> as zinc sources.

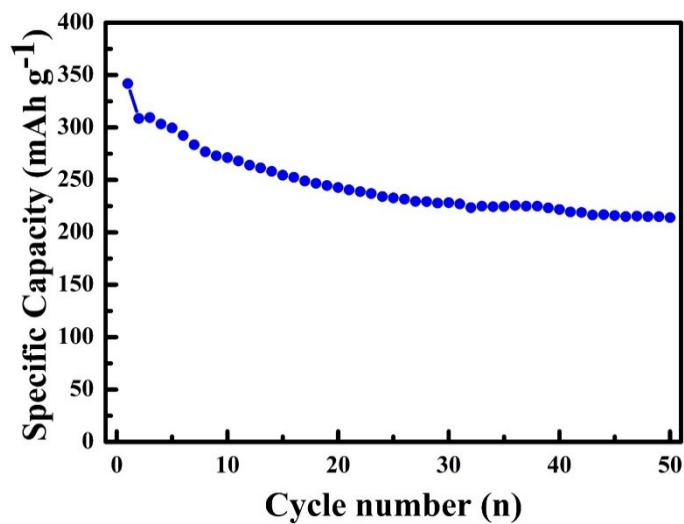

**Figure S6.** Cycle performance of the 2D carbon at a current density of 100 mA g<sup>-1</sup>.

The initial specific capacity of the pure carbon is 341.9 mAh g<sup>-1</sup>, which fades to 214.8 mAh g<sup>-1</sup> after 50 cycles.

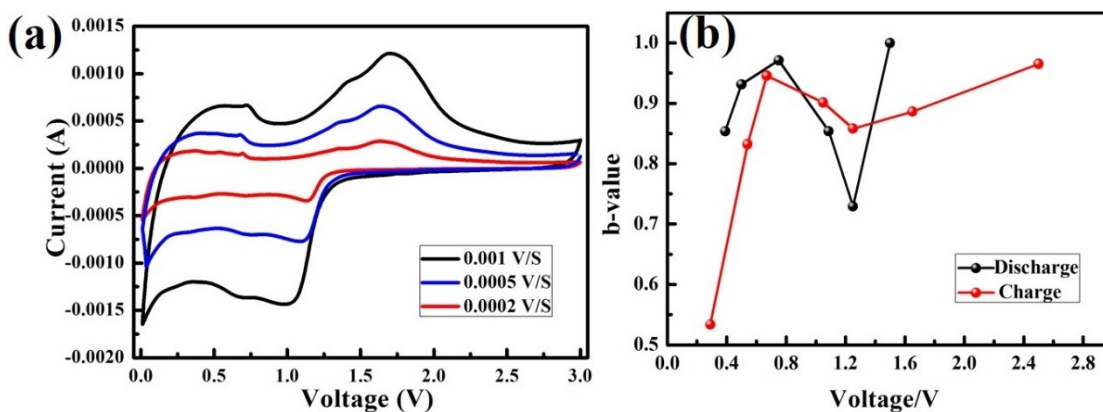

**Fig. S7.** (a) CV curves of the mesh-like  $\text{LiZnBO}_3/\text{C}$  and (b) the corresponding b values vs voltage.

Fig. S7a shows the CV curves of the  $\text{LiZnBO}_3/\text{C}$  after 250 cycles under different scanning rates from 0.0002 to 0.001 V/s. The current  $i$  obeys a power law relationship with the scanning rate  $\nu$ .<sup>[1-3]</sup> The equation is listed as follows:

$$i = a \nu^b$$

Where  $b$  can be used as an important parameter to explain the electrode kinetics. When the  $b$  is 0.5, the electrode is controlled by diffusion process originated from the lithium insertion or extraction, while a surface-controlled electrochemical reaction is dominant if the  $b$  is 1.0. The calculated  $b$  during discharge and charge processes of the  $\text{LiZnBO}_3/\text{C}$  is shown in Fig. S7b. During the discharging process, the  $b$  is in the range of 0.7 to 1.0, which means that there is a mixed contribution of diffusion and surface-controlled response. The capacity increase after 250 cycles may be resulted from the surface-controlled fast electrochemical reaction, which becomes more and more dominant with the increase of the cycle number. This phenomenon is also reported in previous work.<sup>[4]</sup>

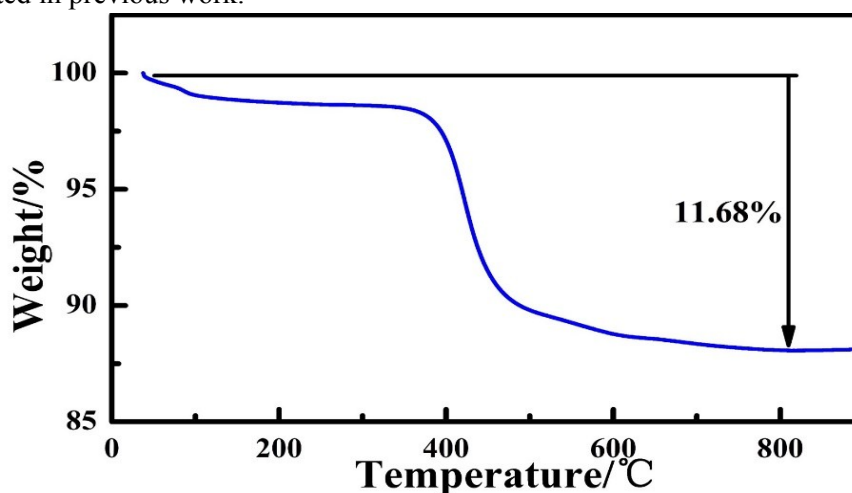

**Fig. S8.** Thermogravimetric curve of the "600-2h".

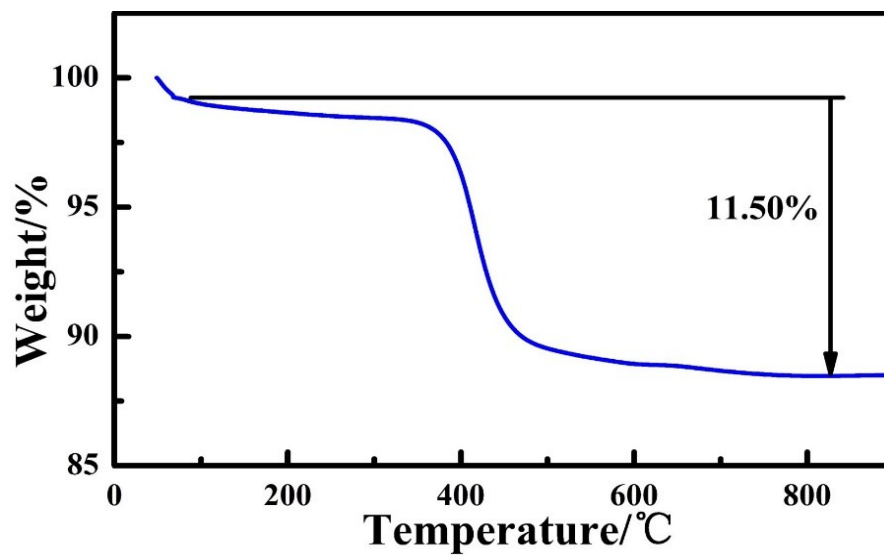

Fig. S9. Thermogravimetric curve of the "600-4h".

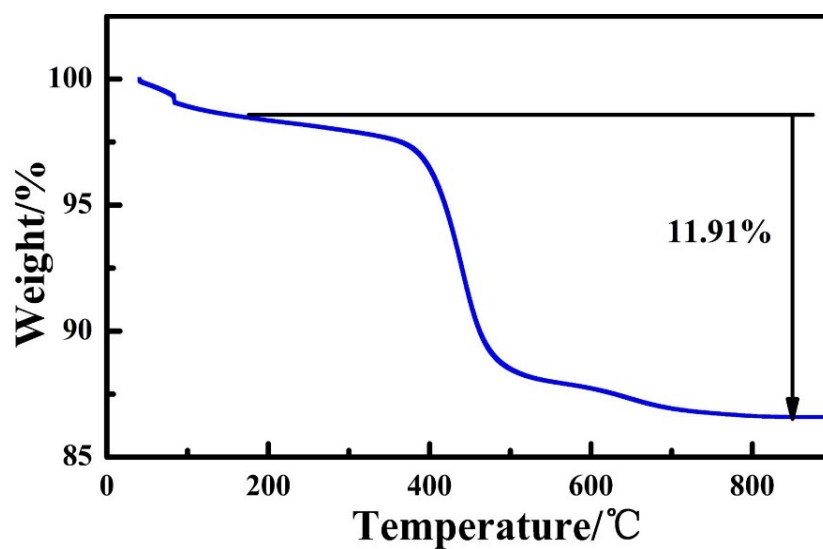

Fig. S10. Thermogravimetric curve of the "600-7h".

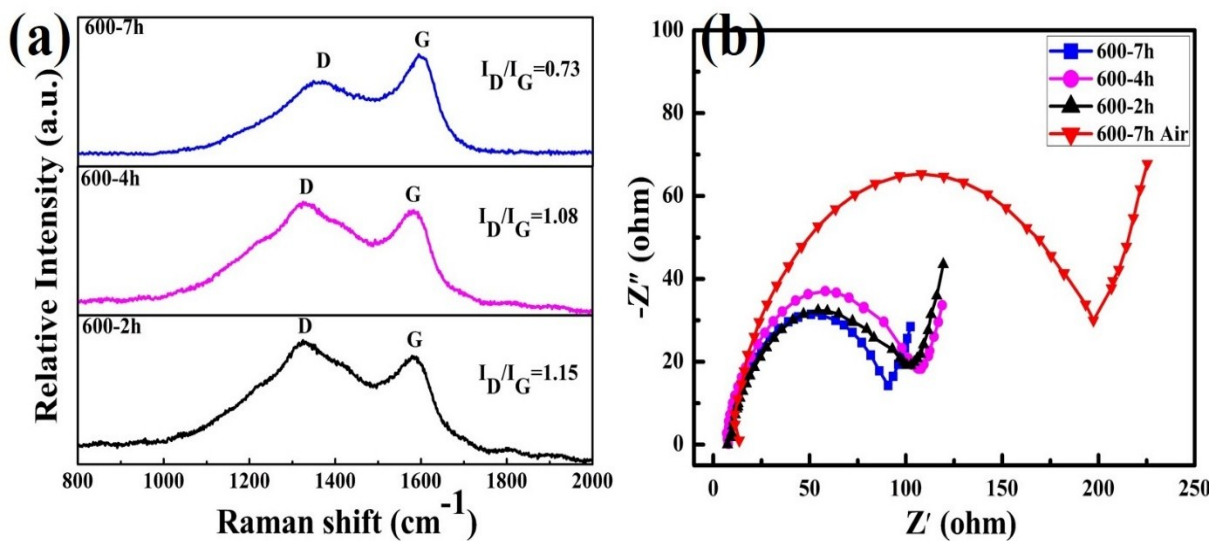

Fig. S11. (a) Raman spectra and (b) EIS spectra of the samples.

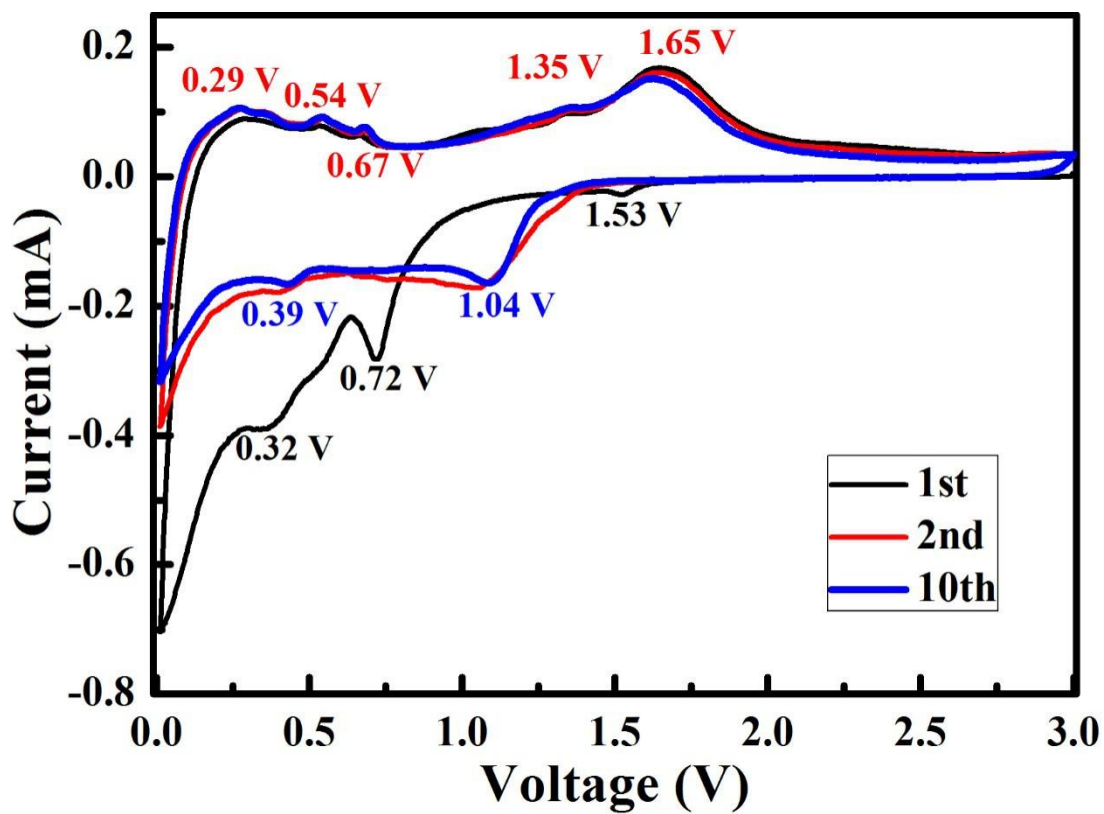

Fig. S12. CV curves of mesh-like  $\text{LiZnBO}_3$  at a scan rate of 0.1 mV/s in the range of 0.01-3.0 V.

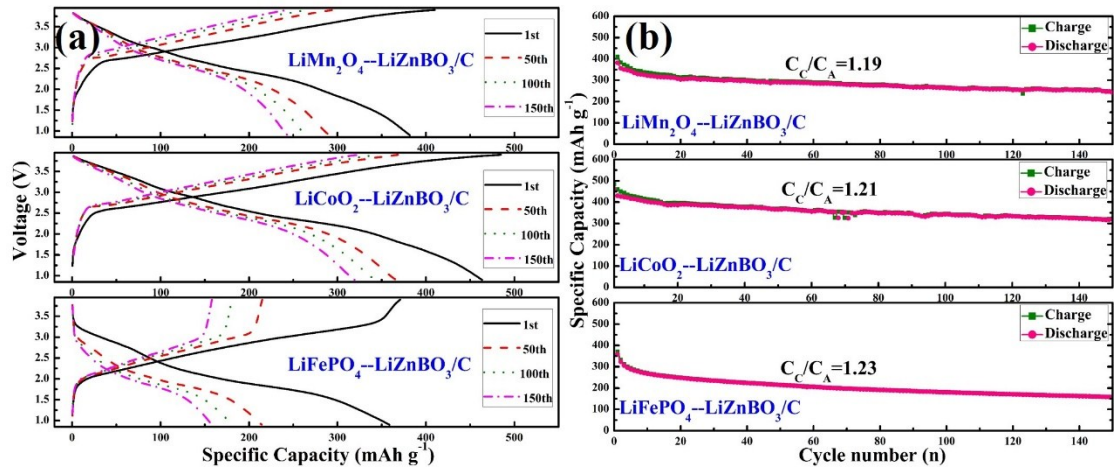

**Fig. S13.** Electrochemical performances of three different full batteries (a) charging-discharging curves and (b) cycle performances.

The discharge/charge curves of the three full cells are displayed in Fig. S13a. The voltage platforms at around 2.7 V, 2.8 V and 2.2 V are consistent with the plateaus of 1.2 V ( $\text{LiZnBO}_3/\text{C}$ ) and 3.9 V ( $\text{LiCoO}_2$ ), 4.0V ( $\text{LiMn}_2\text{O}_4$ ) and 3.4V ( $\text{LiFePO}_4$ ), respectively. Among the three full cell systems at the similar capacity ratio ( $C_C/C_A$  is around 1.2), the  $\text{LiCoO}_2\text{-LiZnBO}_3/\text{C}$  system exhibited the best cycle performance (Fig. S13b).

In Li-ion batteries, the capacities between cathode and anode materials are different. It is essential to experimentally determine an optimal material ratio of cathode ( $C_C$ ) to anode ( $C_A$ ) for good operation. The definitions of  $C_C$  and  $C_A$  can be

$$C_C(\text{mAh}) = C_{\text{practical capacity of cathode}} (\text{mAh g}^{-1}) \times m_{\text{cathode}} (\text{g})$$

$$C_A(\text{mAh}) = C_{\text{practical capacity of anode}} (\text{mAh g}^{-1}) \times m_{\text{anode}} (\text{g})$$

For the  $\text{LiCoO}_2\text{-LiZnBO}_3/\text{C}$  system, the practical capacity of  $\text{LiCoO}_2/\text{LiZnBO}_3/\text{C}$  is 130/726  $\text{mAh g}^{-1}$  in the first cycle at 100  $\text{mA g}^{-1}$ , respectively. We assembled a series of  $\text{LiCoO}_2\text{-LiZnBO}_3/\text{C}$  with varied  $C_C/C_A$  ratios for performance evaluation as in Table S1, showing that the capacity increases with the increased  $C_C/C_A$  ratio from 0.62 to 1.83. However, with further increase of the ratio the capacity of the full cell decreases to a relatively stable value of  $\sim 650$   $\text{mAh g}^{-1}$ . As a result, an optimal  $C_C/C_A$  ratio over a range of 1.68  $\sim$  1.83 is selected for the  $\text{LiCoO}_2\text{-LiZnBO}_3/\text{C}$  cells.

**Table S1.** Charge/discharge capacities of full  $\text{LiCoO}_2\text{-LiZnBO}_3/\text{C}$  cells with different  $C_C/C_A$  ratios in the first cycle.

| $C_C/C_A$                             | 0.62 | 0.71 | 0.88 | 0.93 | 1.06 | 1.68 | 1.83 | 1.92 | 1.94 | 2.45 |
|---------------------------------------|------|------|------|------|------|------|------|------|------|------|
| 1st Charge ( $\text{mAh g}^{-1}$ )    | 460  | 509  | 516  | 563  | 691  | 710  | 728  | 644  | 649  | 657  |
| 1st Discharge ( $\text{mAh g}^{-1}$ ) | 430  | 448  | 464  | 469  | 650  | 657  | 687  | 603  | 612  | 629  |



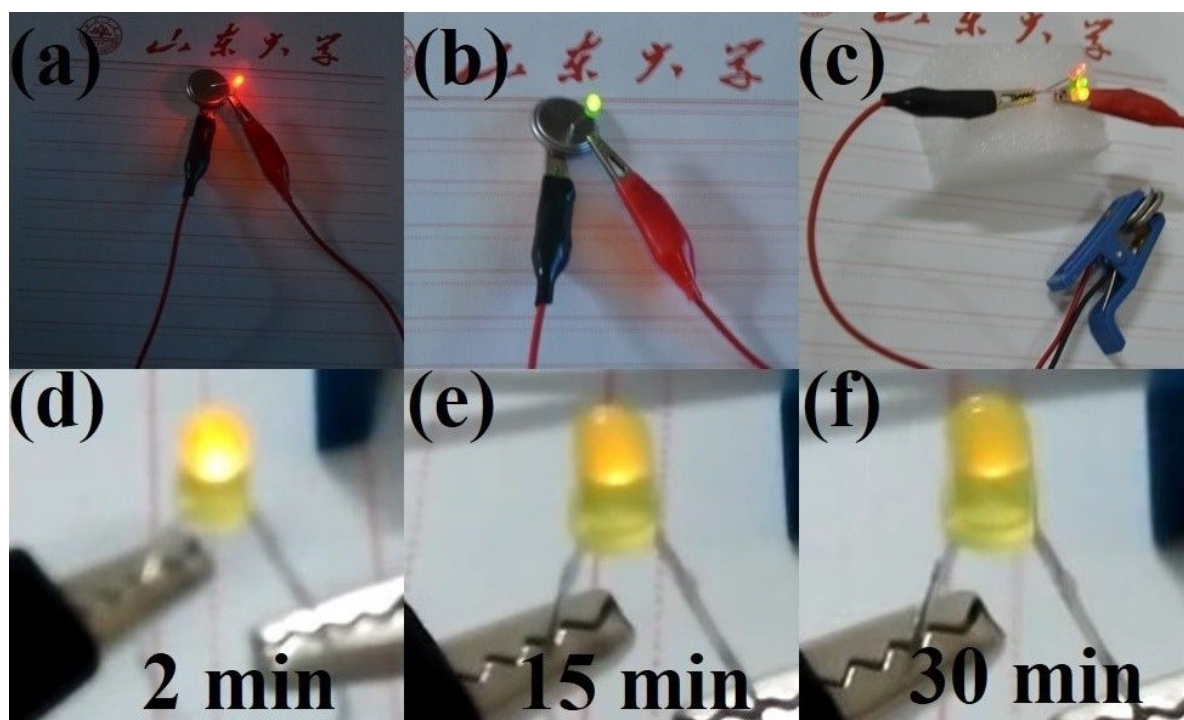

**Fig. S14.** The performances of the full LIBs after rate performance for 60 cycles: (a,b) an individual full cell could light a red/green LED, (c) two full cells could light three LEDs at the same time and (d-f) keep a yellow LED light for 30 min.

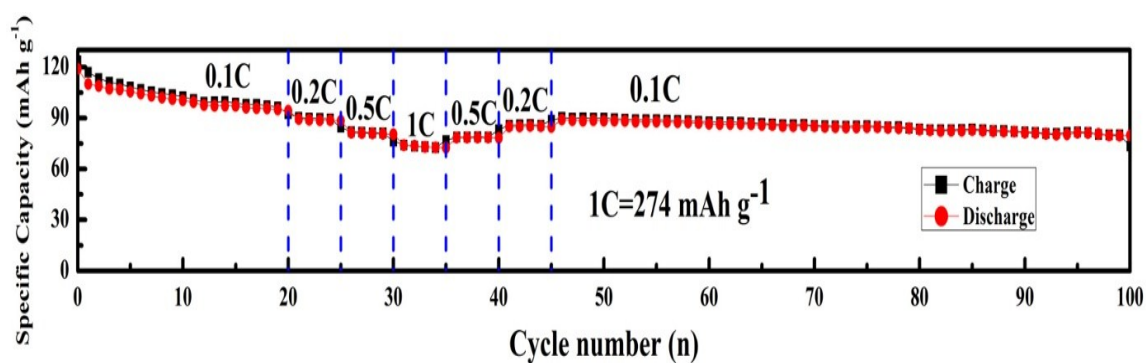

**Fig. S15.** Rate performance of  $\text{LiZnBO}_3/\text{C-LiCoO}_2$  based on the mass of  $\text{LiCoO}_2$ .

#### References

- [1] T. Brezesinski, J. Wang, S.H. Tolbert, B. Dunn, *Nat. Mater.* 2010, **9**, 146.
- [2] V. Augustyn, J. Come, M.A. Lowe, J.W. Kim, P.-L. Taberna, S.H. Tolbert, H.D. Abruna, P. Simon, B. Dunn, *Nat. Mater.* 2013, **12**, 518.

[3] K. Z. Cao, L. F. Jiao, Y. C. Liu, H. Q. Liu, Y. J. Wang, H. T. Yuan, *Adv. Funct. Mater.* 2015, **25**, 1082.

[4] Y. L. Zhou, D. Yan, H. Y. Xu, J. K. Feng, X. L. Jiang, J. Yue, J. Yang, Y. T. Qian, *Nano Energy* 2015, **12**, 528.
